# Supplementary material
Source: MDPI journal article supplement (https://www.mdpi.com/2072-4292/8/11/925)
Supplement: s1 [file s1]

**Christof J. Weissteiner, Martin Ickerott, Hannes Ott, Markus Probeck, Gernot Ramminger, Nicola Clerici, Hans Dufourmont and Ana Maria Ribeiro de Sousa**

Figures S1 and S2 show composing sources of the ARZ/PRZ ratio, for a country-wise and DU-wise approach, i.e., the country-wise and DU-wise ARZ and PRZ sums are visible. The regression lines serve as orientation lines, in order to understand each country's or DU's position within the continental context. The country-wise regression lines are both depicted for (i) all countries and (ii) for all countries without NO, SE, FI, which exhibit particular high ARZ values. Similarly, the DU-regression is depicted for (i) all DUs and for (ii) all DUs without Nordic DUs, which exhibit again particularly high ARZ values.

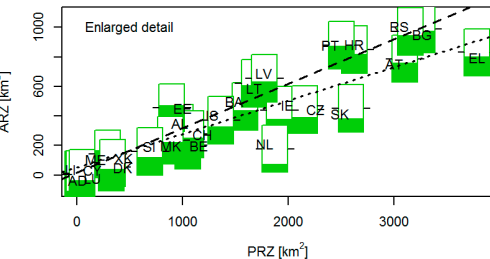

**Figure S1.** Country-wise comparison of ARZ/PRZ ratios dependent on the individual overall extents. Due to extra-ordinary high ARZ abundance for three Nordic countries (NO, FI, SE), regression lines were calculated with/without them. The small graph displays the indicated detail.

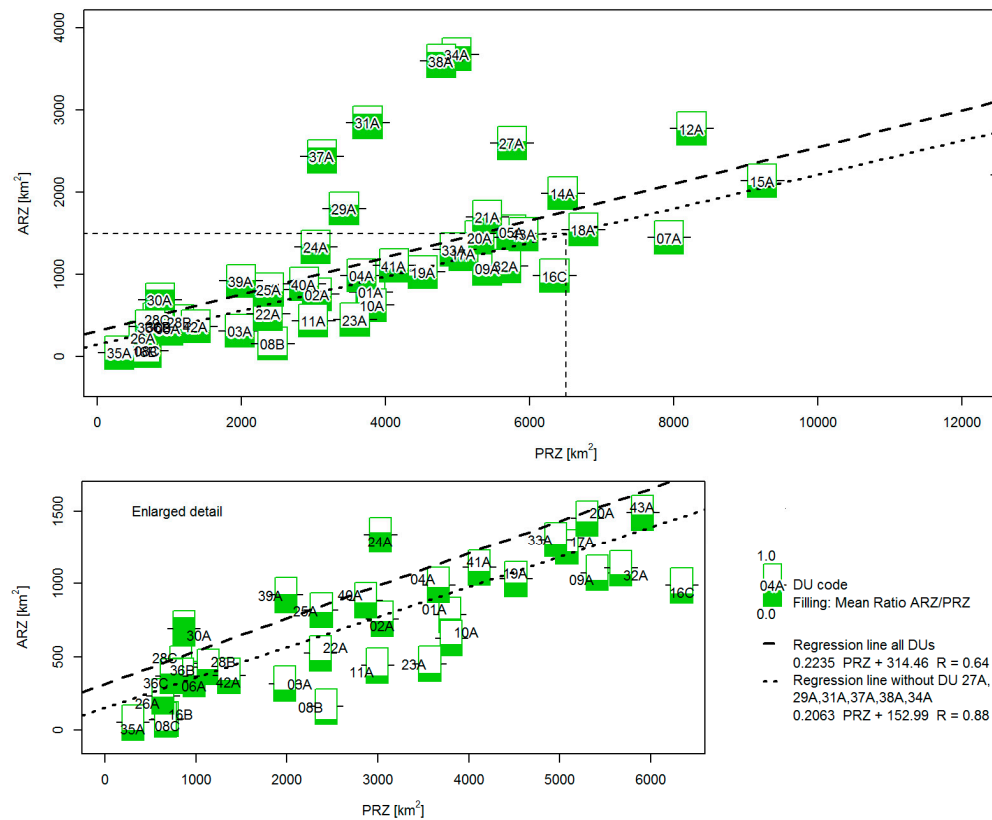

**Figure S2.** DU-wise comparison between ARZ and PRZ. Due to extra-ordinary high ARZ abundance for some Nordic DUs (27A, 29A, 31A, 37A, 38A, 34A), regression lines were calculated with/without them. The small graph displays the indicated detail.

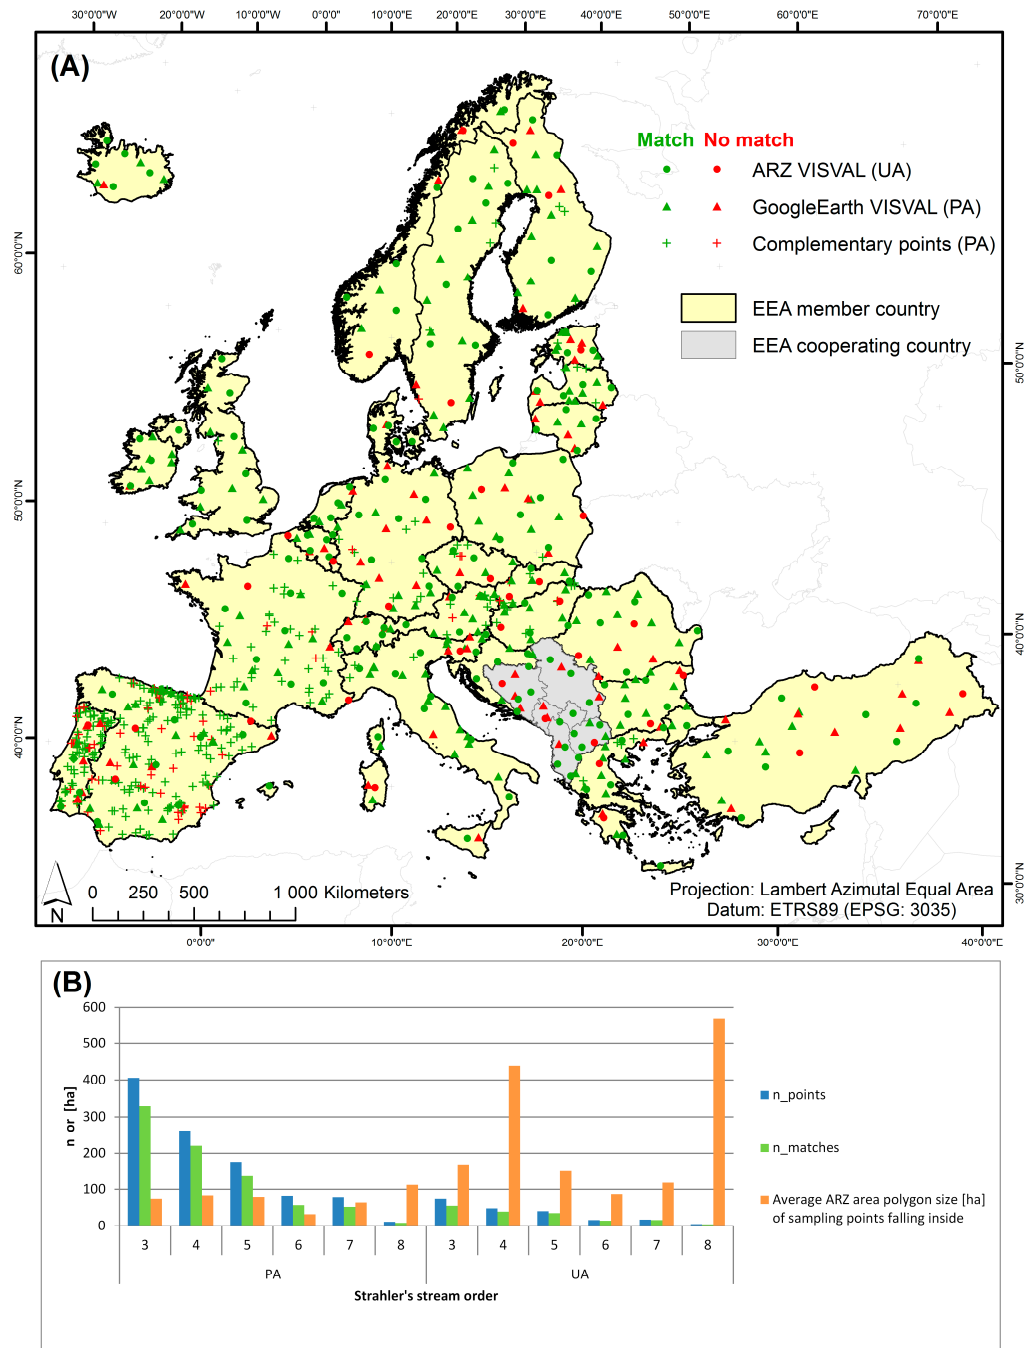

**Figure S3.** (A) Spatial distribution of the visual validation points and complementary points used in the accuracy assessment; (B) Number of checkpoints and matches as well as checkpoint's containing ARZ polygon size (average) per Strahler's stream order and accuracy type (Producer's accuracy (PA) and User's accuracy (UA)).

**Table S1.** Nomenclature of the Land Cover and Land Use product, including the highest level of class discrimination at level 4 (level 1 is compatible with the MAES ecosystem types), and MS degree assigned to each class.

| Level 1     | Level 2                                                                       | Level 3                                                                                                                 | Level 4                                                                                                   | MS Assigned |
|-------------|-------------------------------------------------------------------------------|-------------------------------------------------------------------------------------------------------------------------|-----------------------------------------------------------------------------------------------------------|-------------|
| 1 Urban     | 1.1 Urban fabric, industrial, commercial, public, military and private units  | 1.1.1 Dense to medium dense urban fabric (IM.D. >30%–100% + industrial, commercial, public, military and private units) | 1.1.1.1 Continuous urban fabric (in-situ based or IM.D. > 80%–100%)                                       | 0           |
|             |                                                                               |                                                                                                                         | 1.1.1.2 Dense urban fabric (IM.D. > 30%–80% + industrial, commercial, public, military and private units) | 0           |
|             |                                                                               |                                                                                                                         | 1.1.1.3 Industrial or commercial units                                                                    | 0           |
|             |                                                                               | 1.1.2 Low density urban fabric (IM.D. 0%–30%)                                                                           | 1.1.2.1 Low density urban fabric (IM.D. 0%–30%)                                                           | 0           |
|             | 1.2 Transport infrastructure                                                  | 1.2.1 Transport infrastructure                                                                                          | 1.2.1.1 Road networks and associated land                                                                 | 0           |
|             |                                                                               |                                                                                                                         | 1.2.1.2 Railways and associated land                                                                      | 0           |
|             |                                                                               |                                                                                                                         | 1.2.1.3 Port areas                                                                                        | 0           |
|             |                                                                               |                                                                                                                         | 1.2.1.4 Airports                                                                                          | 0           |
|             | 1.3 Mineral extraction, dump and construction sites, land without current use | 1.3.1 Mineral extraction, dump and construction sites                                                                   | 1.3.1.1 Mineral extraction, dump and construction sites                                                   | 0           |
|             |                                                                               | 1.3.2 Land without current use                                                                                          | 1.3.2.1 Land without current use                                                                          | 0           |
|             | 1.4 Green urban, sports and leisure facilities                                | 1.4.1 Green urban areas                                                                                                 | 1.4.1.1 Green urban areas T.C.D. $\geq$ 30%                                                               | 0.5         |
|             |                                                                               |                                                                                                                         | 1.4.1.2 Green urban areas T.C.D. < 30%                                                                    | 0.5         |
|             |                                                                               | 1.4.2 Sports and leisure facilities                                                                                     | 1.4.2.1 Sports and leisure facilities T.C.D. $\geq$ 30%                                                   | 0.5         |
|             |                                                                               |                                                                                                                         | 1.4.2.2 Sports and leisure facilities T.C.D. < 30%                                                        | 0.5         |
| 2 Croplands | 2.1 Arable land                                                               | 2.1.1 Non-irrigated arable land                                                                                         | 2.1.1.1 Non-irrigated arable land                                                                         | 0           |
|             |                                                                               | 2.1.2 Greenhouses                                                                                                       | 2.1.2.1 Greenhouses                                                                                       | 0           |
|             |                                                                               | 2.1.3 Irrigated arable land and rice fields                                                                             | 2.1.3.1 Irrigated arable land and rice fields                                                             | 0           |
|             |                                                                               | 2.1.4 Complex patterns of irrigated and non-irrigated arable land                                                       | 2.1.4.1 Complex patterns of irrigated and non-irrigated arable land                                       | 0           |
|             | 2.2 Permanent crops                                                           | 2.2.1 Vineyards                                                                                                         | 2.2.1.1 Vineyards                                                                                         | 0           |
|             |                                                                               | 2.2.2 Fruit trees and berry plantations                                                                                 | 2.2.2.1 High stem fruit trees (extensively managed)                                                       | 0           |

|                       |                                     |                                                                                             |                                                                                               |     |
|-----------------------|-------------------------------------|---------------------------------------------------------------------------------------------|-----------------------------------------------------------------------------------------------|-----|
| 3 Woodland and forest | 2.3 Heterogeneous agricultural area |                                                                                             | 2.2.2.2 Low stem fruit trees and berry plantations                                            | 0   |
|                       |                                     | 2.2.3 Olive groves                                                                          | 2.2.3.1 Olive groves                                                                          | 0   |
|                       |                                     | 2.3.1 Annual crops associated with permanent crops                                          | 2.3.1.1 Annual crops associated with permanent crops                                          | 0.5 |
|                       |                                     | 2.3.2 Complex cultivation patterns                                                          | 2.3.2.1 Complex cultivation patterns                                                          | 0   |
|                       |                                     | 2.3.3 Land principally occupied by agriculture with significant areas of natural vegetation | 2.3.3.1 Land principally occupied by agriculture with significant areas of natural vegetation | 0.5 |
|                       |                                     | 2.3.4 Agro-forestry T.C.D. $\geq 30\%$                                                      | 2.3.4.1 Agro-forestry T.C.D. $\geq 30\%$                                                      | 0.5 |
|                       | 3.1 Broadleaved forest              | 2.3.5 Agro-forestry T.C.D. $< 30\%$                                                         | 2.3.5.1 Agro-forestry T.C.D. $< 30\%$                                                         | 0.5 |
|                       |                                     | 3.1.1 Riparian and fluvial Broadleaved forest                                               | 3.1.1.1 Riparian and fluvial broadleaved forest                                               | 1   |
|                       |                                     | 3.1.2 Broadleaved swamp forest                                                              | 3.1.2.1 Broadleaved swamp forest                                                              | 1   |
|                       |                                     | 3.1.3 Other natural & semi natural broadleaved forest                                       | 3.1.3.1 Other natural & semi natural broadleaved forest                                       | 0.5 |
|                       |                                     | 3.1.4 Broadleaved evergreen forest                                                          | 3.1.4.1 Broadleaved evergreen forest                                                          | 0.5 |
|                       |                                     | 3.1.5 Highly artificial broadleaved plantations                                             | 3.1.5.1 Highly artificial broadleaved plantations                                             | 0.5 |
|                       | 3.2 Coniferous forest               | 3.2.1. Riparian and fluvial coniferous forest                                               | 3.2.1.1 Riparian and fluvial coniferous forest                                                | 1   |
|                       |                                     | 3.2.2 Coniferous swamp forest                                                               | 3.2.2.1 Coniferous swamp forest                                                               | 1   |
|                       |                                     | 3.2.3 Other natural & semi natural coniferous forest                                        | 3.2.3.1 Other natural & semi natural coniferous forest                                        | 0.5 |
|                       |                                     | 3.2.4 Highly artificial coniferous plantations                                              | 3.2.4.1 Highly artificial coniferous plantations                                              | 0.5 |
|                       | 3.3 Mixed forest                    | 3.3.1. Riparian and fluvial mixed forest                                                    | 3.3.1.1 Riparian and fluvial mixed forest                                                     | 1   |
|                       |                                     | 3.3.2 Mixed swamp forest                                                                    | 3.3.2.1 Mixed swamp forest                                                                    | 1   |
|                       |                                     | 3.3.3 Other natural & semi natural mixed forest                                             | 3.3.3.1 Other natural & semi natural mixed forest                                             | 0.5 |
|                       |                                     | 3.3.4 Highly artificial mixed plantations                                                   | 3.3.4.1 Highly artificial mixed plantations                                                   | 0.5 |
|                       | 3.4 Transitional woodland scrub     | 3.4.1 Transitional woodland scrub                                                           | 3.4.1.1 Transitional woodland and scrub                                                       | 0.5 |
|                       |                                     |                                                                                             | 3.4.1.2 Lines of trees and scrub                                                              | 0.5 |
|                       | 3.5 Damaged forest                  | 3.5.1 Damaged forest                                                                        | 3.5.1.1 Forest damaged by fire                                                                | 0.5 |
|                       |                                     |                                                                                             | 3.5.1.2 Other damaged forest                                                                  | 0.5 |
| 4 Grassland           | 4.1 Managed grassland               | 4.1.1 Managed grassland                                                                     | 4.1.1.1 Managed grasslands with trees and scrubs (T.C.D. $\geq 30\%$ )                        | 0   |

|                                           |                                           |                                                             |                                                                      |     |
|-------------------------------------------|-------------------------------------------|-------------------------------------------------------------|----------------------------------------------------------------------|-----|
|                                           |                                           |                                                             | 4.1.1.2 Managed grasslands without trees and scrubs (T.C.D. < 30%)   | 0   |
|                                           |                                           | 4.2.1 Natural grasslands prevailingly with trees and scrubs | 4.2.1.1 Dry grasslands with trees (T.C.D. > 30%)                     | 0   |
|                                           |                                           |                                                             | 4.2.1.2 Mesic grasslands with trees (T.C.D. > 30%)                   | 1   |
|                                           | 4.2 Natural grasslands                    |                                                             | 4.2.2.1 Dry grasslands without trees (T.C.D. < 30%)                  | 0   |
|                                           |                                           | 4.2.2 Natural grasslands without trees and scrubs           | 4.2.2.2 Mesic grasslands without trees (T.C.D. < 30%)                | 1   |
|                                           |                                           |                                                             | 4.2.2.3 Alpine and subalpine grasslands without trees (T.C.D. < 30%) | 0.5 |
| 5 Heathland and scrub                     | 5.1 Moors and heathland                   | 5.1.1 Moors and heathland                                   | 5.1.1.1 Heathlands and Moorlands                                     | 0.5 |
|                                           |                                           |                                                             | 5.1.1.2 Other scrub land                                             | 0.5 |
|                                           | 5.2 Sclerophyllous vegetation             | 5.2.1 Sclerophyllous vegetation                             | 5.2.1.1 Sclerophyllous vegetation                                    | 0.5 |
| 6 Sparsely vegetated land                 | 6.1 Sparsely vegetated areas              | 6.1.1 Sparsely vegetated areas                              | 6.1.1.1 Sparsely vegetated areas                                     | 0.5 |
|                                           |                                           |                                                             | 6.2.1.1 Beaches                                                      | 0.5 |
|                                           |                                           | 6.2.1 Beaches, dunes, sands                                 | 6.2.1.2 Dunes                                                        | 0   |
|                                           |                                           |                                                             | 6.2.1.3 River banks                                                  | 1   |
|                                           | 6.2 Bare soil, rock, perennial snow & ice |                                                             | 6.2.2.1 Bare rocks and rock debris                                   | 0   |
|                                           |                                           | 6.2.2 Bare rocks, burnt areas, glaciers and perpetual snow  | 6.2.2.2 Burnt areas (except burnt forest)                            | 0.5 |
|                                           |                                           |                                                             | 6.2.2.3 Glaciers and perpetual snow                                  | 0   |
| 7 Wetland                                 | 7.1 Inland marshes                        | 7.1.1 Inland freshwater marshes                             | 7.1.1.1 Inland freshwater marshes                                    | 1   |
|                                           |                                           | 7.1.2 Inland saline marshes                                 | 7.1.2.1 Inland saline marshes                                        | 0.5 |
|                                           | 7.2 Peat bogs                             | 7.2.1 Peat bogs                                             | 7.2.1.1 Exploited peat bog                                           | 0.5 |
|                                           |                                           |                                                             | 7.2.1.2 Unexploited peat bog                                         | 0.5 |
| 8 Lagoons, coastal wetlands and estuaries | 8.1 Maritime wetlands                     | 8.1.1 Salt marshes & salines                                | 8.1.1.1 Salt marshes                                                 | 0.5 |
|                                           |                                           |                                                             | 8.1.1.2 Salines                                                      | 0   |
|                                           |                                           | 8.1.2 Intertidal flats                                      | 8.1.2.1 Intertidal flats                                             | 0.5 |
|                                           | 8.2 Marine waters                         | 8.2.1 Coastal lagoons                                       | 8.2.1.1 Coastal lagoons                                              | 0   |
|                                           |                                           | 8.2.2 Estuaries                                             | 8.2.2.1 Estuaries                                                    | 0   |
| 9 Rivers and lakes                        | 9.1 Water courses                         | 9.1.1 Interconnected running water courses                  | 9.1.1.1 Permanent interconnected running water courses               | 0   |

|                   |                     |                       |                         |                                                                                          |   |
|-------------------|---------------------|-----------------------|-------------------------|------------------------------------------------------------------------------------------|---|
|                   |                     |                       |                         | 9.1.1.2 Intermittently running water courses                                             | 0 |
|                   |                     |                       |                         | 9.1.1.3 Highly modified natural water courses and canals                                 | 0 |
|                   |                     |                       |                         | 9.1.2 Separated water bodies belonging to the river system (dead side-arms, flood ponds) | 0 |
|                   |                     |                       |                         | 9.2.1.1 Natural water bodies                                                             | 0 |
|                   |                     |                       |                         | 9.2.1.2 Ponds and lakes with completely man-made structure                               | 0 |
|                   |                     |                       |                         | 9.2.1.3 Intensively managed fish ponds                                                   | 0 |
|                   |                     |                       |                         | 9.2.1.4 Standing water bodies of extractive industrial sites                             | 0 |
| 10 Marine (other) | 10.1 Marine (other) | 10.1.1 Marine (other) | 10.1.1.1 Marine (other) |                                                                                          |   |

IM.D. = Imperviousness Degree; T.C.D. = Tree Crown Density
